## Erratum

In the originally published versions of the below-listed manuscripts, erroneous files were included in the Supplementary Data. These errors have been corrected and the files removed.

<https://doi.org/10.1093/biomet/asab026>

<https://doi.org/10.1093/biomet/asab016>

<https://doi.org/10.1093/biomet/asaa106>
